# Supplementary material for: Synthesis of phosphorus-containing cardanol-derived phenalkamine: a sustainable curing agent to access high-performance bio-based epoxy thermosets
Source: Royal Society of Chemistry journal article supplement (doi:10.1039/d2gc03783a), 2022-01-01
Supplement: d2gc03783a1.pdf [file d2gc03783a1.pdf]

*Supplementary Material for*

**Synthesis of phosphorus-containing cardanol-derived phenalkamine:  
a sustainable curing agent to access high-performance bio-based  
epoxy thermosets**

Xin Wang <sup>a</sup>, Jiali Huang <sup>a</sup>, Lei Song <sup>a\*</sup>, Yuan Hu <sup>a,\*\*</sup>

<sup>a</sup> *State Key Laboratory of Fire Science, University of Science and Technology of China, 96 Jinzhai  
Road, Hefei, Anhui 230026, P. R. China*

\*Corresponding author. Tel./Fax: +86-551-63601664; E-mail address:  
leisong@ustc.edu.cn (L. Song), yuanhu@ustc.edu.cn (Y. Hu).

**Table S1.** The curing kinetics parameters of the DGEBA/DDM, DGEBA/Car-DCP-DETA and DGEBA/Car-DPC-DETA curing systems.

| Sample             | T <sub>onset</sub><br>(K) | T <sub>p</sub> (K) | T <sub>end</sub><br>(K) | E <sub>a</sub> (kJ/mol) |        | n    |
|--------------------|---------------------------|--------------------|-------------------------|-------------------------|--------|------|
|                    |                           |                    |                         | Kissinger               | Ozawa  |      |
| DGEBA/DDM          | 326.3                     | 394.6              | 478.6                   | 43.35                   | 47.91  | 0.91 |
| DGEBA/Car-DCP-DETA | 358.1                     | 421.8              | 466.2                   | 70.28                   | 73.82  | 0.93 |
| DGEBA/Car-DPC-DETA | 374.6                     | 432.8              | 472.1                   | 129.26                  | 129.93 | 0.95 |

**Table S2.** TGA data of the cured DGEBA/DDM, DGEBA/Car-DCP-DETA and DGEBA/Car-DPC-DETA thermosets in air and nitrogen atmospheres.

| Sample             | T <sub>.10%</sub> (°C) |                | T <sub>.75%</sub> (°C) |                | Char residue (%) at 800 °C |                | UL-94 |
|--------------------|------------------------|----------------|------------------------|----------------|----------------------------|----------------|-------|
|                    | Air                    | N <sub>2</sub> | Air                    | N <sub>2</sub> | Air                        | N <sub>2</sub> |       |
|                    | DGEBA/DDM              | 371.9          | 374.8                  | 554.0          | 455.1                      | 0.2            |       |
| DGEBA/Car-DCP-DETA | 288.2                  | 302.3          | 533.7                  | 448.9          | 3.4                        | 14.3           | V-0   |
| DGEBA/Car-DPC-DETA | 310.3                  | 327.8          | 531.2                  | 421.0          | 0.9                        | 6.5            | NR    |

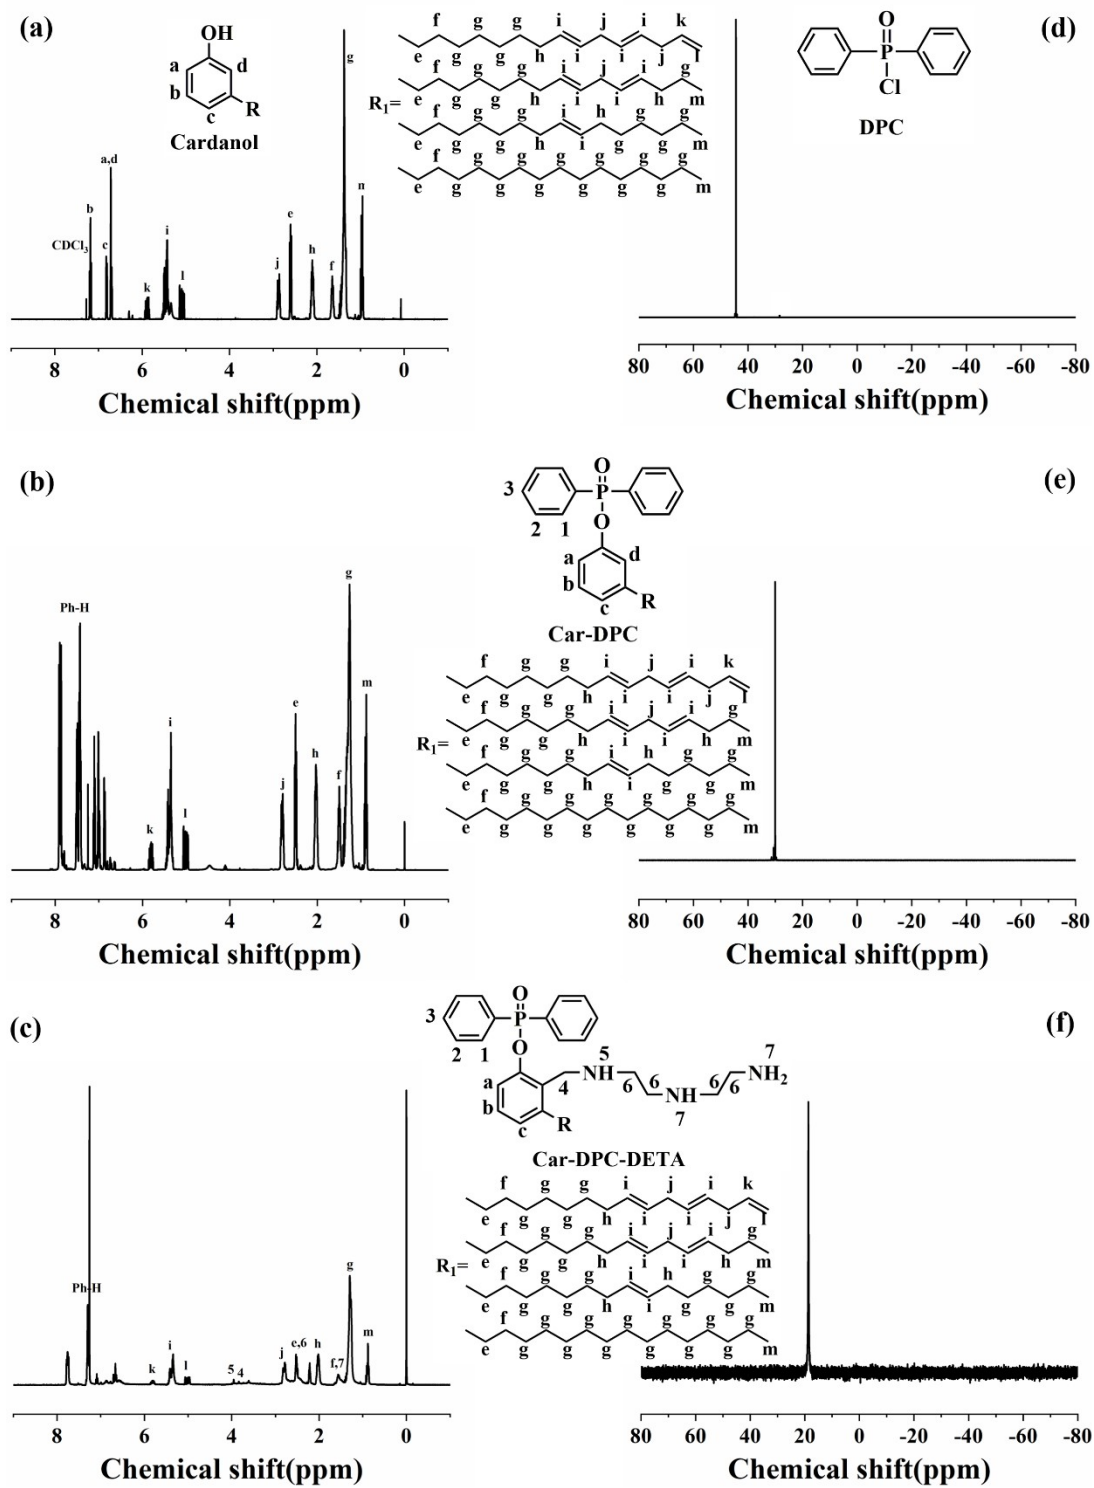

**Fig. S1.** The <sup>1</sup>H NMR spectra of (a) cardanol, (b) Car-DPC and (c) Car-DPC-DETA and the <sup>31</sup>P NMR spectra of (d) DPC, (e) Car-DPC and (f) Car-DPC-DETA.

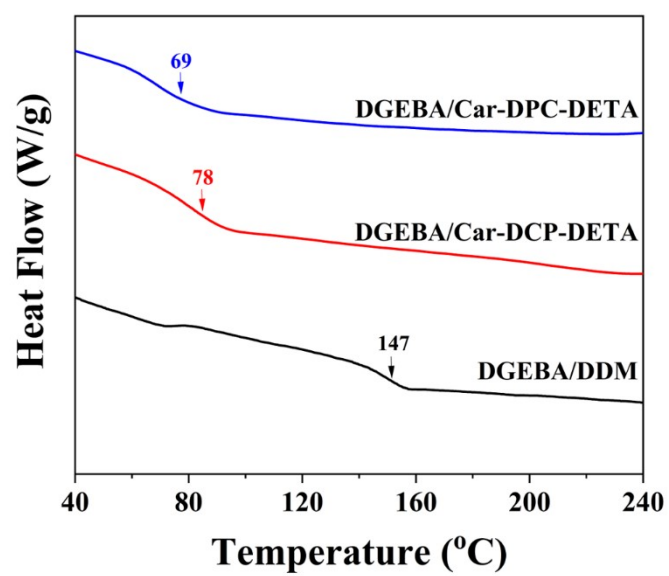

**Fig. S2.** DSC thermograms of the cured DGEBA/DDM, DGEBA/Car-DCP-DETA and DGEBA/Car-DPC-DETA.

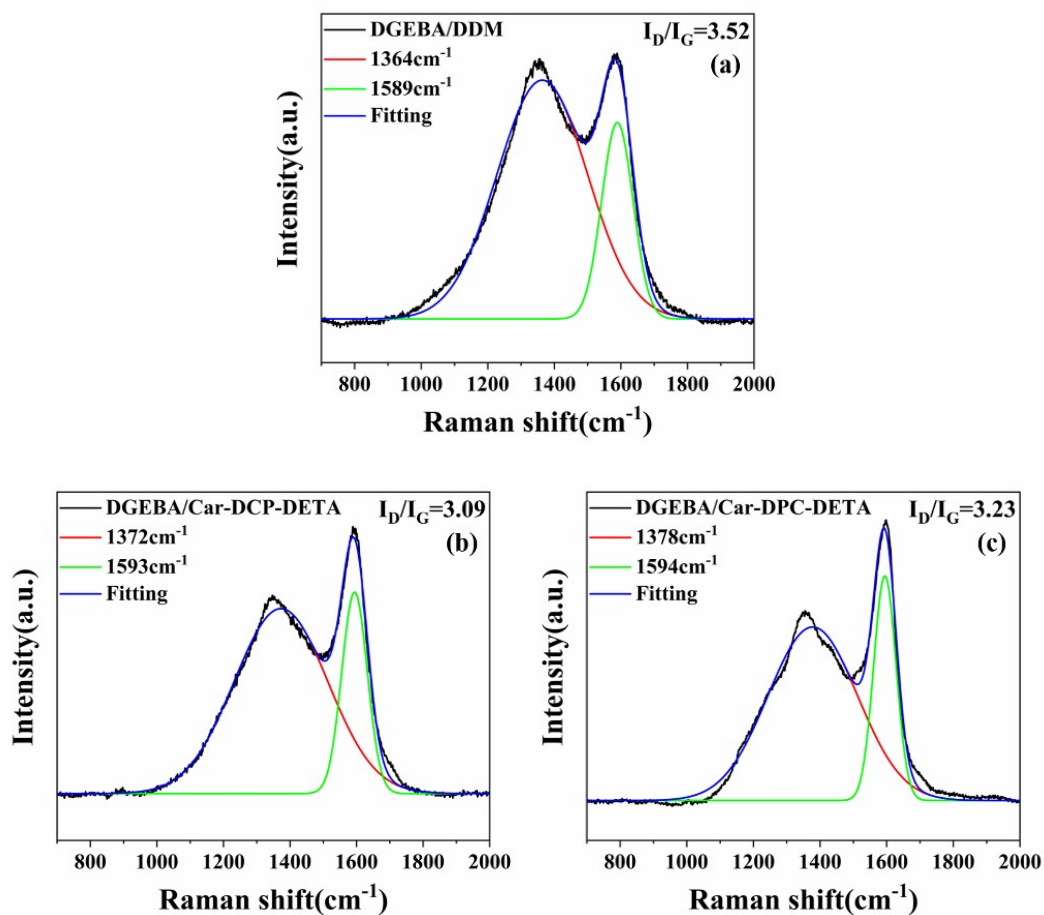

**Fig. S3.** Raman spectra of the char residues after the cone calorimeter test of (a) DGEBA/DDM, (b) DGEBA/Car-DCP-DETA and (c) DGEBA/Car-DPC-DETA.

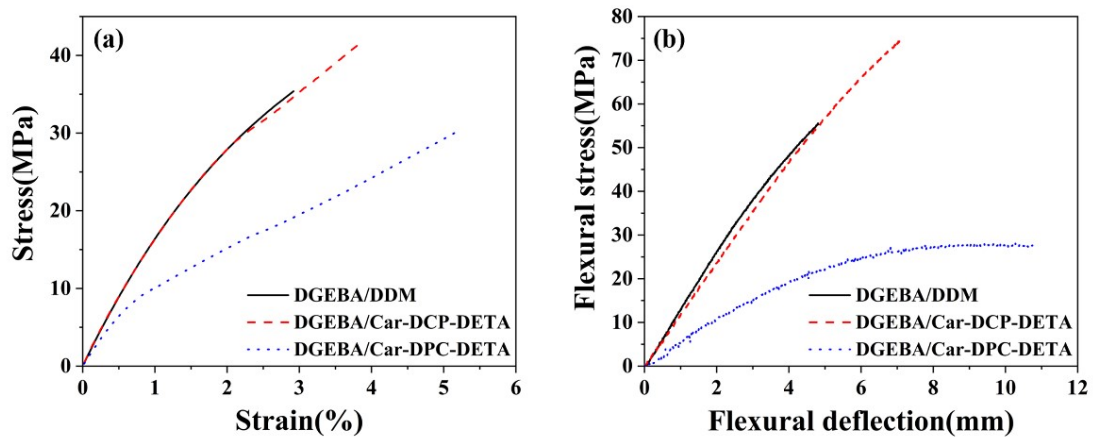

**Fig. S4.** (a) Tensile stress-strain curves and (b) flexural stress-strain curves of DGEBA/DDM, DGEBA/Car-DCP-DETA and DGEBA/Car-DPC-DETA.

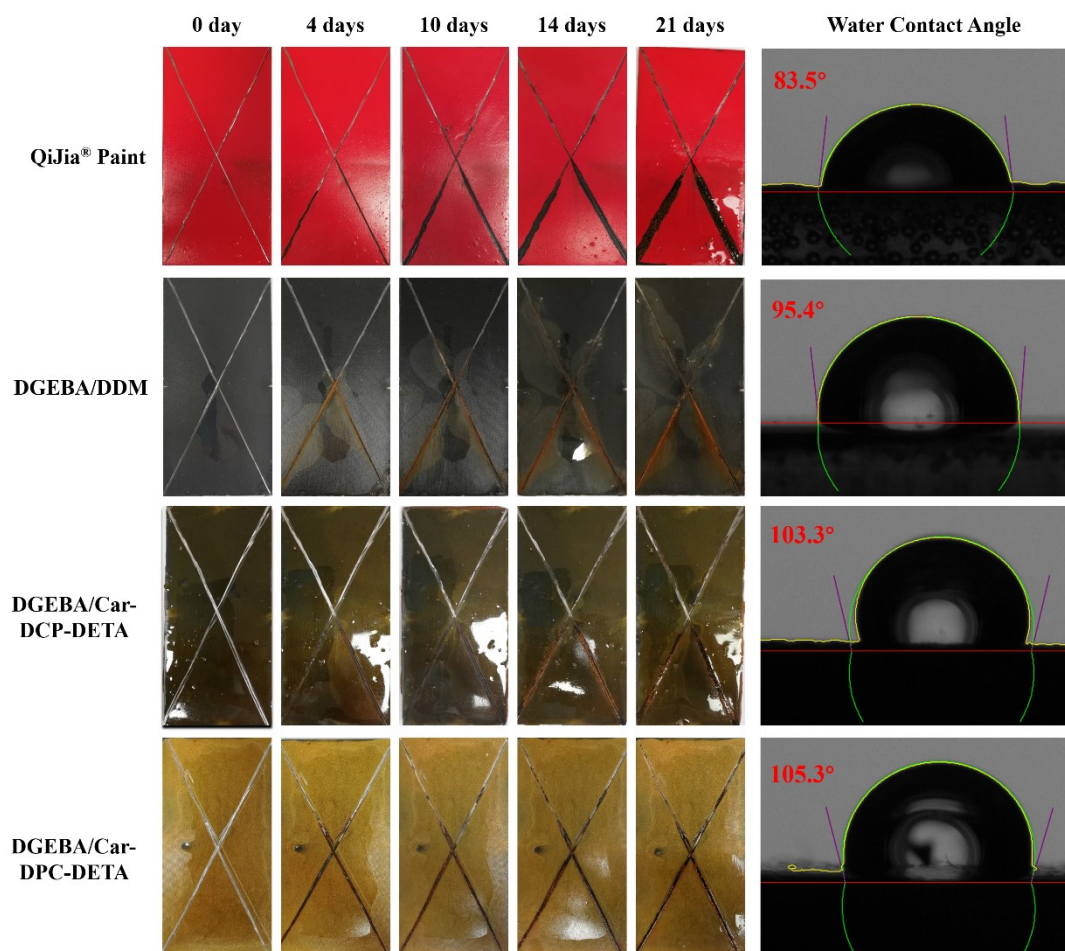

**Fig. S5.** Digital photographs of steel plates coated with DGEBA/DDM, DGEBA/Car-DPC-DETA, DGEBA/Car-DPC-DETA and a commercial epoxy-based coating (QiJia). The water contact angle (WCA) values of DGEBA/DDM, DGEBA/Car-DPC-DETA, DGEBA/Car-DPC-DETA and a commercial epoxy-based coating (QiJia).
